# Supplementary material for: Copper Chaperone for Cu/Zn Superoxide Dismutase is a sensitive biomarker of mild copper deficiency induced by moderately high intakes of zinc
Source: Springer Nature journal article supplement (doi:10.1186/1475-2891-4-35), 2005-11-24
Supplement: Additional file 2 [file 1475-2891-4-35-s2.pdf]

Table 2: QPCR primers

| Gene<br>(GenBank<br>accession no.)             |         | Primer Sets (5' – 3')              | Product Size<br>(bp) |
|------------------------------------------------|---------|------------------------------------|----------------------|
| <i>ZnT-1</i><br>(U17133)                       | Forward | ACC AGG CAG AGC CAG AGA AGT T      | 226                  |
|                                                | Reverse | TCG TCT TCA GTA CAA CCC TTC CAG G  |                      |
| <i>ZnT-2</i><br>(NM_012890)                    | Forward | GCG CTG TGG CTG TGA ACA TCA TAA    | 137                  |
|                                                | Reverse | AAC CAC ATG AAT GAA GGC AGC TCG    |                      |
| <i>ZnT-4</i><br>(NM_172066)                    | Forward | TAG TGC ACA TGC AGC TAA TTC CCG    | 258                  |
|                                                | Reverse | TCA GGG ACT CCA TTA GGT TTG CGT    |                      |
| <i>Zip4</i>                                    | Forward | CAA TAT CAC GCT GCC CGA ATT GGA    | 203                  |
|                                                | Reverse | CAG CCA TTA CAT CTT TGG CAC TCA GG |                      |
| <i>MT-1</i><br>(NM_138826)                     | Forward | TAC ACC GTT GCT CCA GAT TCA CCA    | 255                  |
|                                                | Reverse | TAT TTA CAC CTG AGG GCA GCA GCA    |                      |
| <i><math>\beta</math>-Actin</i><br>(NM_031144) | Forward | AGG TCA TCA CTA TCG GCA ATG AGC    | 164                  |
|                                                | Reverse | AGA CAG CAC TGT GTT GGC ATA GAG    |                      |
