# Supplementary material for: Copper Chaperone for Cu/Zn Superoxide Dismutase is a sensitive biomarker of mild copper deficiency induced by moderately high intakes of zinc
Source: Springer Nature journal article supplement (doi:10.1186/1475-2891-4-35), 2005-11-24
Supplement: Additional file 3 [file 1475-2891-4-35-s3.pdf]

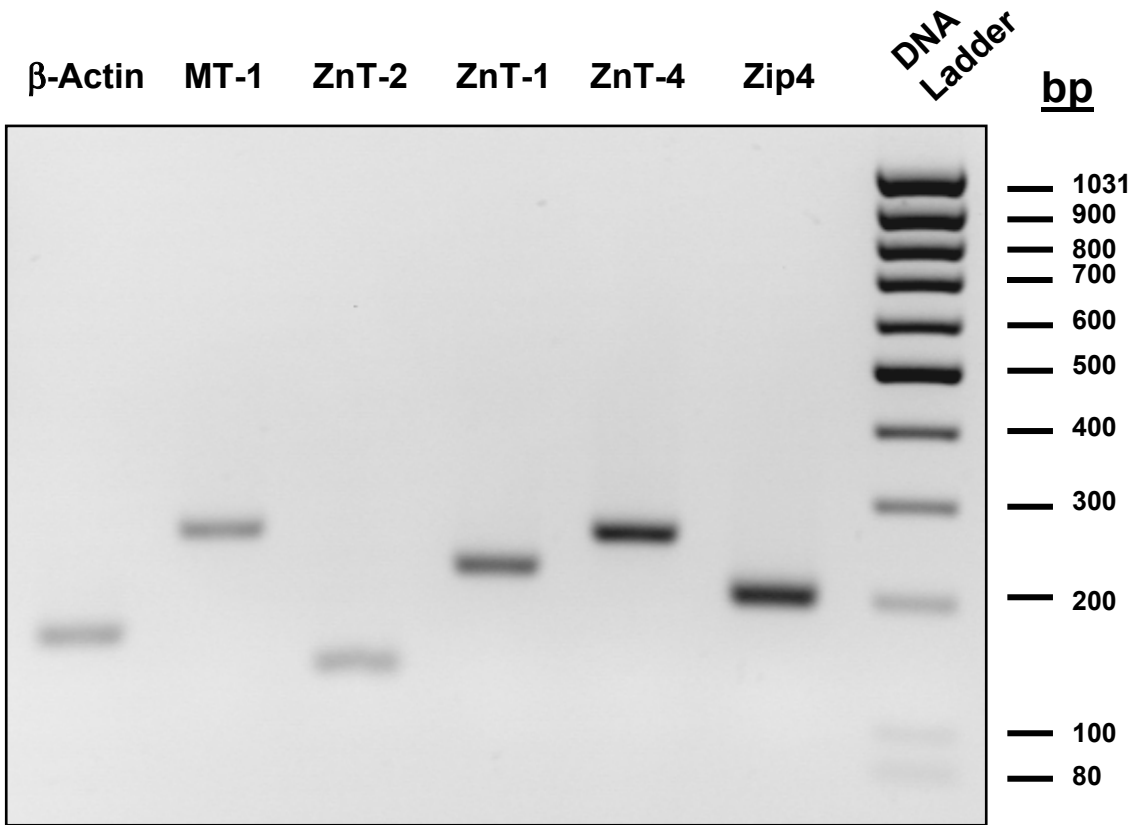

**Figure 1: PCR fragments of genes analysed by QPCR.** PCR fragments of the rat  $\beta$ -Actin, MT-1, ZnT-1, ZnT-2, ZnT-4 and Zip4 genes were amplified from total RNA isolated from rat duodenum using the QIAGEN OneStep RT-PCR Kit with the primer sets used for QPCR analyses. PCR products were run on a 1.5% agarose gel and visualized with ethidium bromide staining. Sizes of DNA fragments of the Low Range MassRuler™ DNA Ladder (Fermentas, Burlington, Canada) are shown to the right.
